# Supplementary material for: The M3 phosphorylation motif has been functionally conserved for intracellular trafficking of long-looped PIN-FORMEDs in the Arabidopsis root hair cell
Source: PubMed Central journal article supplement (PMC4222813; doi:10.1186/1471-2229-13-189), 2013-11-26
Supplement: 1471-2229-13-189-S1.pdf [file 1471-2229-13-189-S1.pdf]

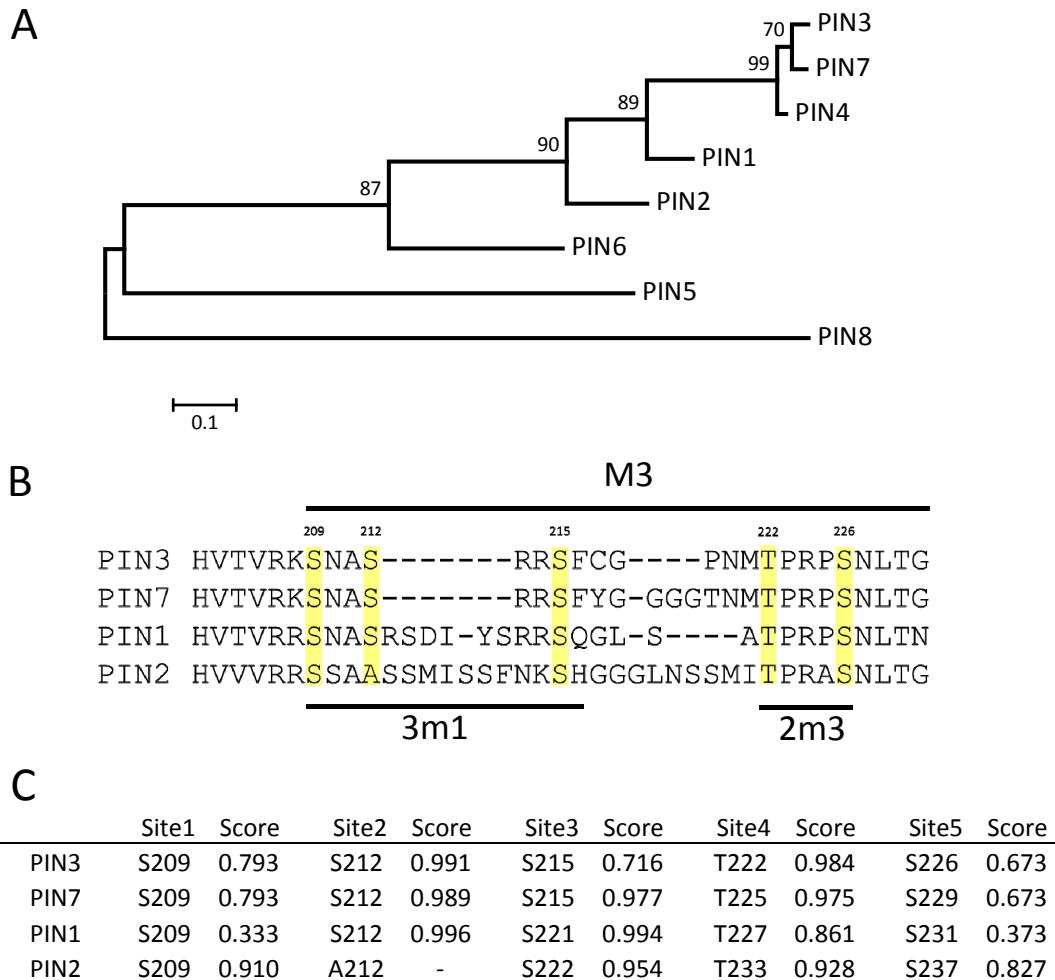

**Figure S1. Conservation of the M3 motif in long PINs.** (A) Phylogeny of Arabidopsis PIN proteins. The tree was constructed with the HL sequences using the Neighbor-Joining method. The optimal tree with the sum of branch length = 3.53854304 is shown. The percentage of replicate trees in which the associated taxa clustered together in the bootstrap test (1000 replicates) are shown next to the branches. The tree is drawn to scale, with branch lengths in the same units as those of the evolutionary distances used to infer the phylogenetic tree. The evolutionary distances were computed using the Poisson correction method and are in the units of the number of amino acid substitutions per site. All positions containing gaps and missing data were eliminated. (B) Alignment of the M3 motifs from PIN1, 2, 3 and 7. Positions were numbered according to PIN3 amino acid sequence. All S/T residues are conserved in the motif except PIN2 A212. (C) Phosphorylation index scored by NetPhos 2.0 server (<http://www.cbs.dtu.dk/services/NetPhos/>).

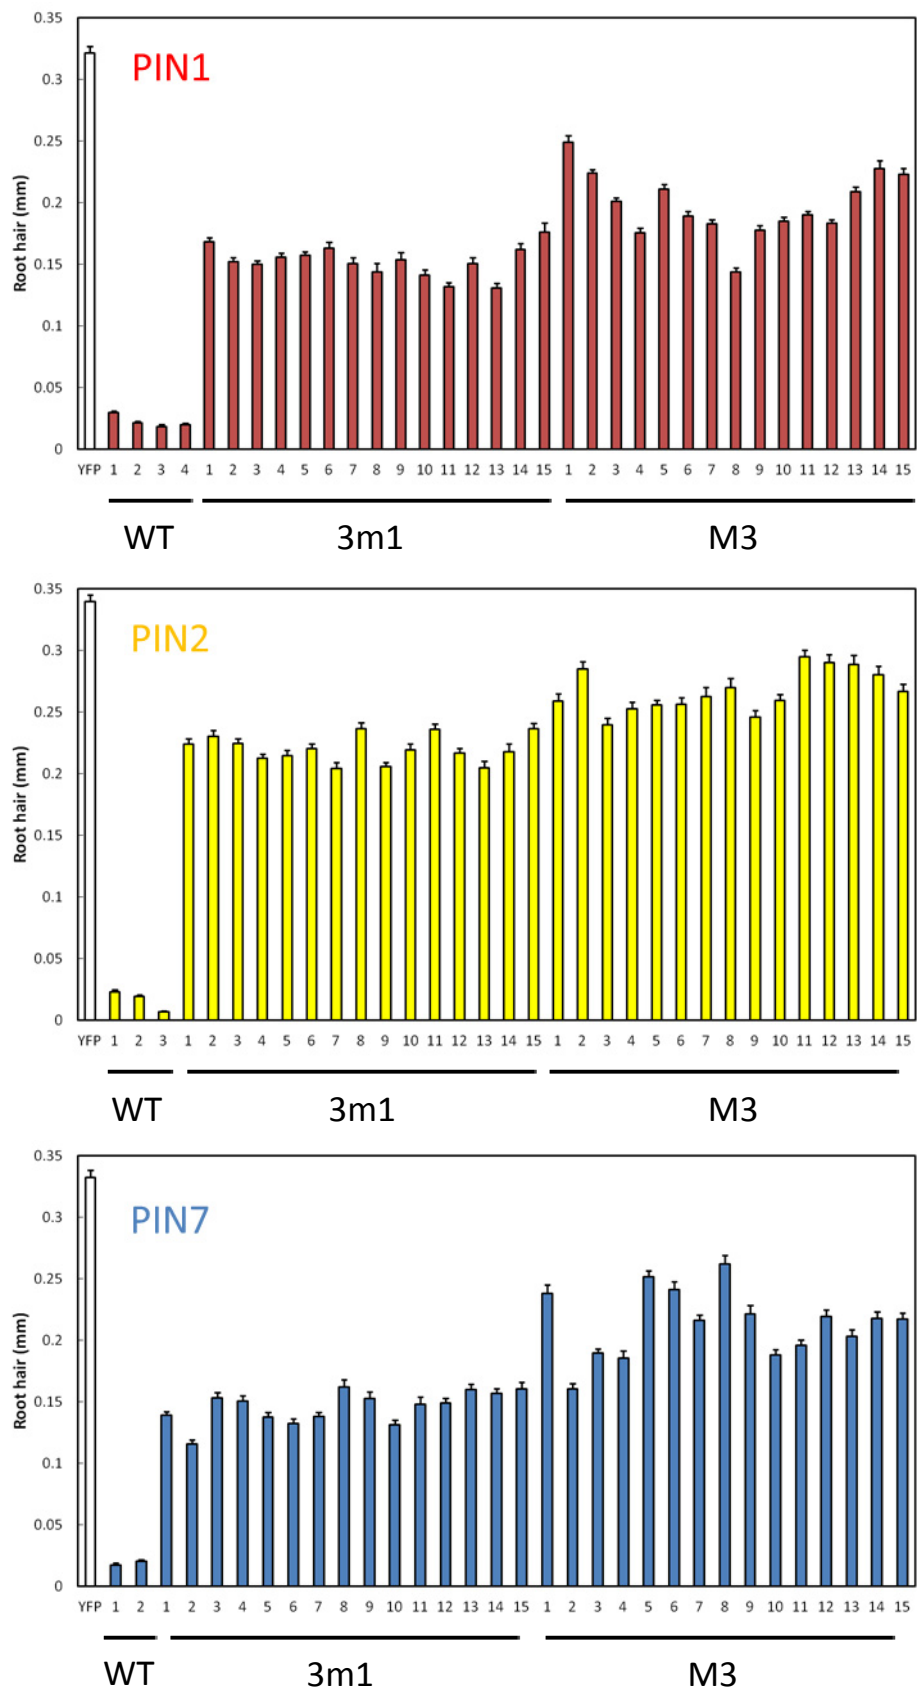

**Figure S2. Root hair length of independent transgenic lines.** Root hair length was estimated with control (YFP, ProE7:YFP), wild-type PIN expression lines (WT), and phosphorylation-defective PIN expression lines (3m1 and M3). WT-, 3m1-, and M3-PINs were expressed under ProE7. The results were obtained from 7-12 seedlings, 132-485 root hairs for PIN1, 5-16 seedlings, 150-563 root hairs for PIN2, and 5-11 seedlings, 141-453 root hairs for PIN7. Data represent means  $\pm$  SE.

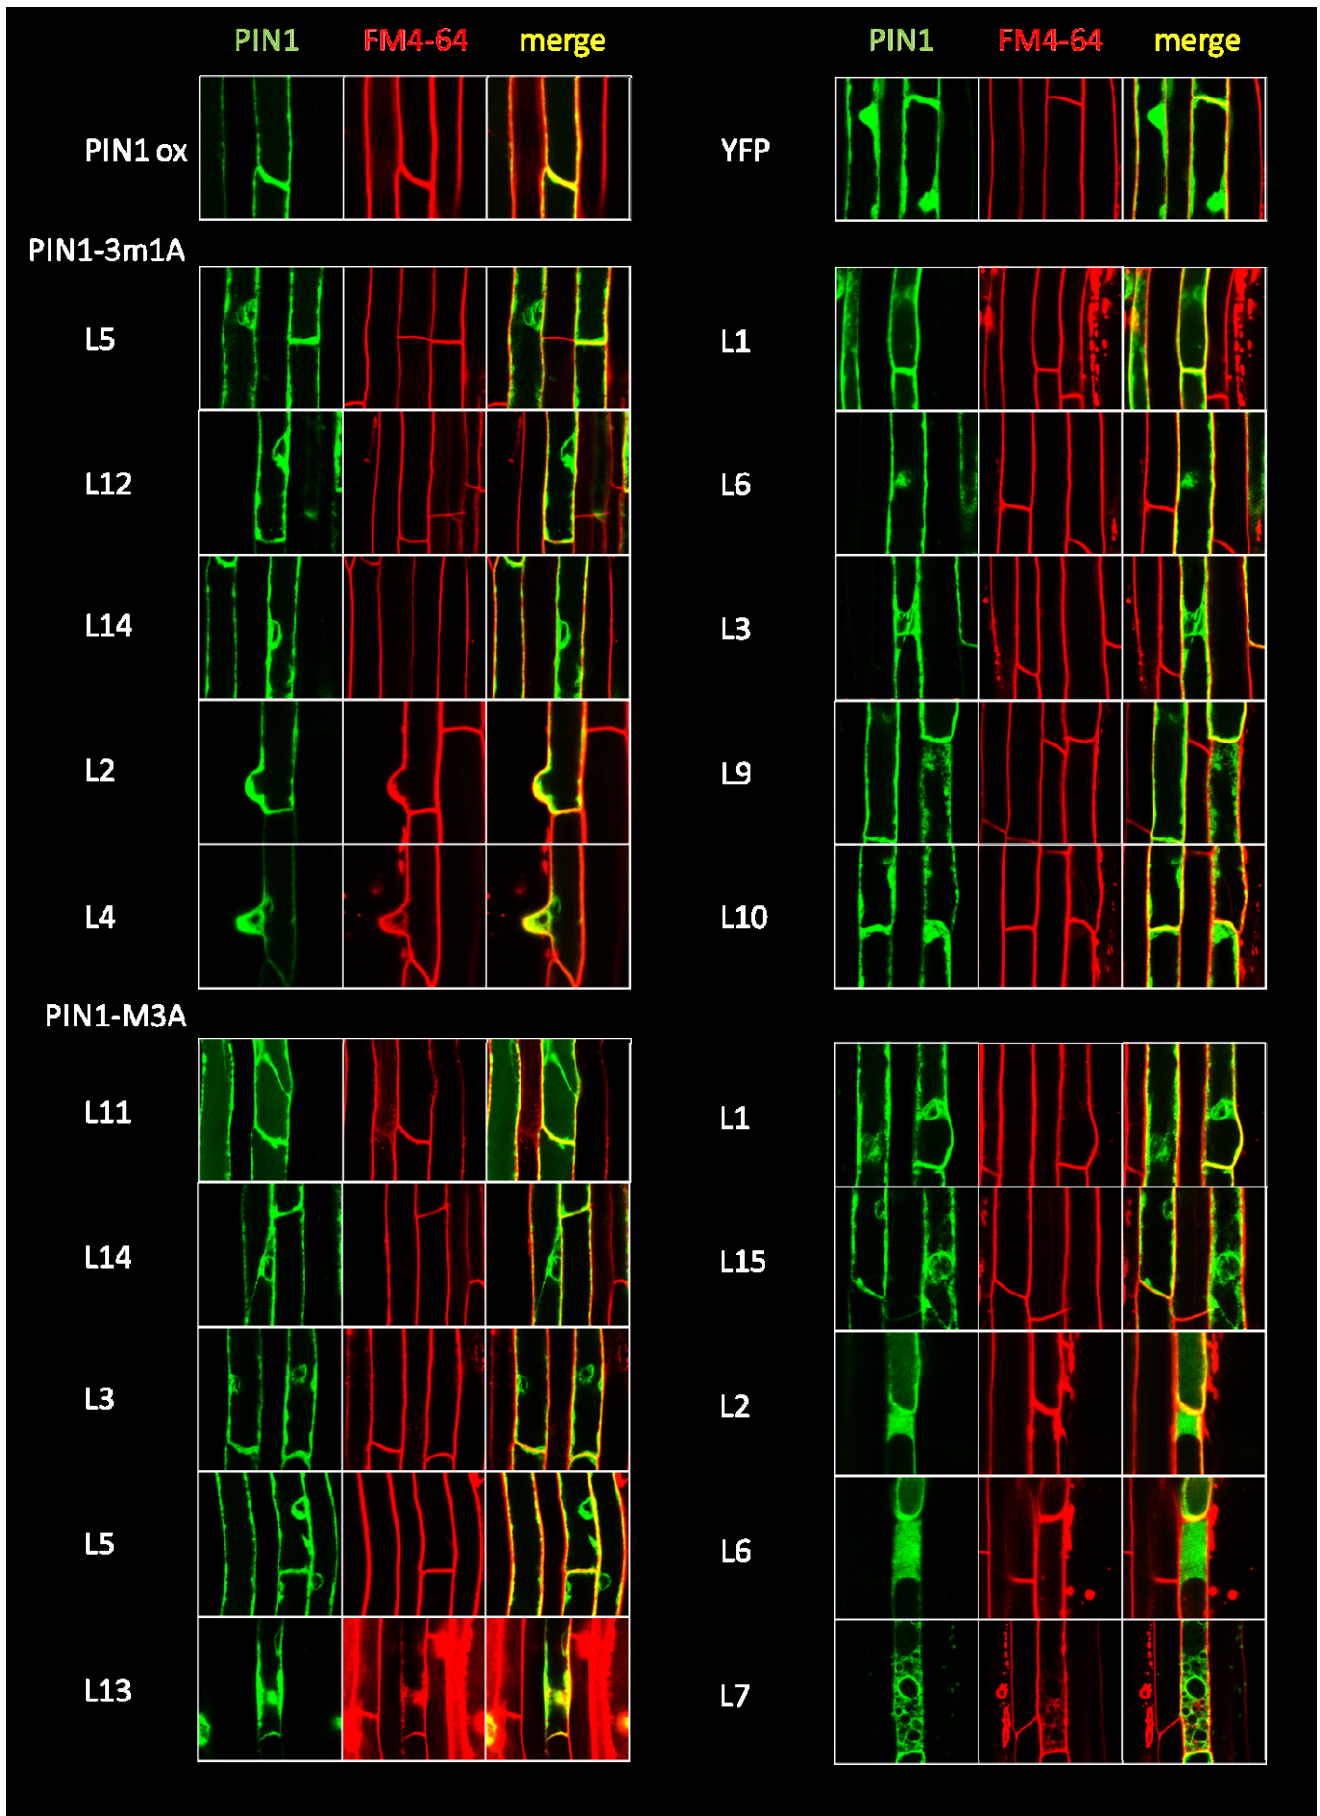

**Figure S3. Confocal images of M3 phosphorylation-defective PIN1 lines.** Confocal images showing the subcellular localization of ProE7:PIN1, ProE7:3m1-PIN1 (PIN1-3m1A), and ProE7:M3-PIN1 (PIN1-M3A) in root hair cells. Four-day-old seedlings were used and stained with FM4-64 (2  $\mu$ M). Ten independent lines were observed for each mutant.

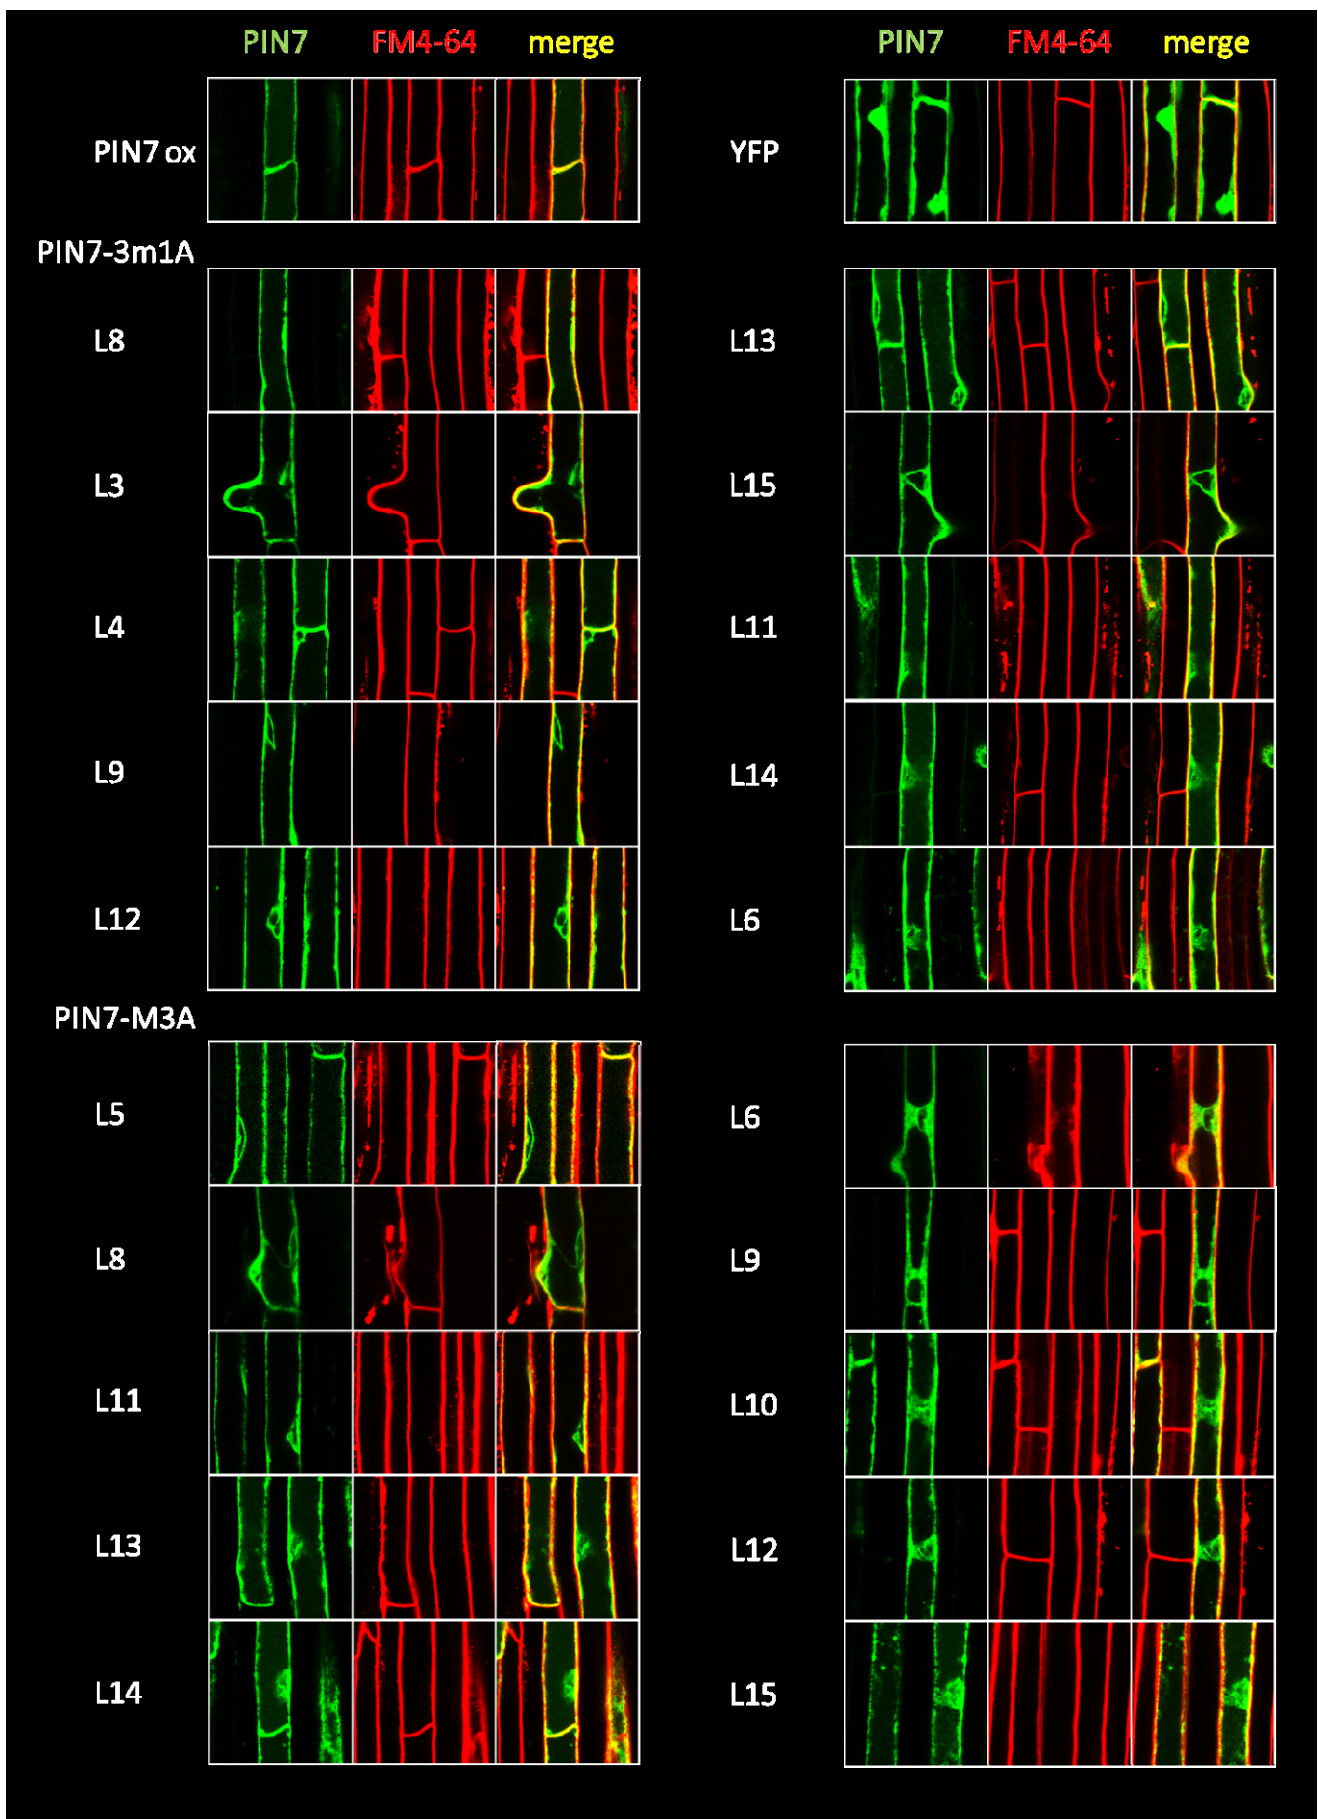

**Figure S4. Confocal images of M3 phosphorylation-defective PIN7 lines.** Confocal images showing the subcellular localization of ProE7:PIN7, ProE7:3m1-PIN7 (PIN7-3m1A), and ProE7:M3-PIN7 (PIN7-M3A) in root hair cells. Four-day-old seedlings were used and stained with FM4-64 (2  $\mu$ M). Ten independent lines were observed for each mutant.

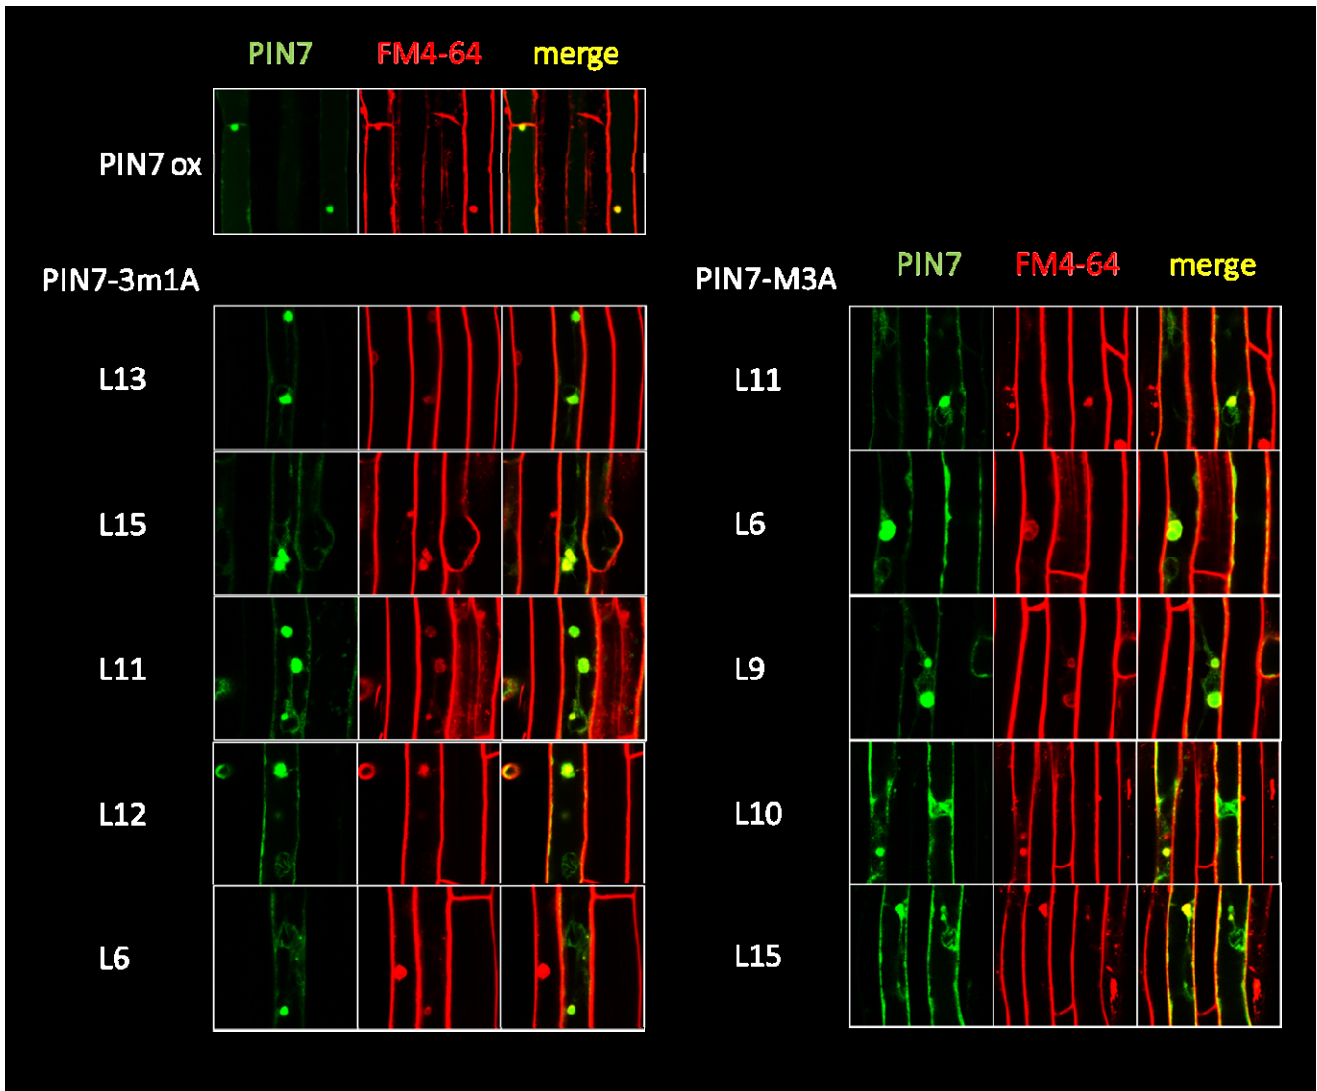

**Figure S5. Confocal images of the root hair cells from BFA-treated M3 phosphorylation-defective PIN7 lines.** Confocal images showing the subcellular localization of ProE7:PIN7, ProE7:3m1-PIN7 (PIN7-3m1A), and ProE7:M3-PIN7 (PIN7-M3A) in root hair cells after BFA treatment. Transgenic seedlings were pretreated with 50  $\mu$ M cycloheximide for 30 min, followed by treatment with or without 25  $\mu$ M BFA for 1 hour, and stained with FM4-64 (2  $\mu$ M). Five independent lines were observed for each mutant.

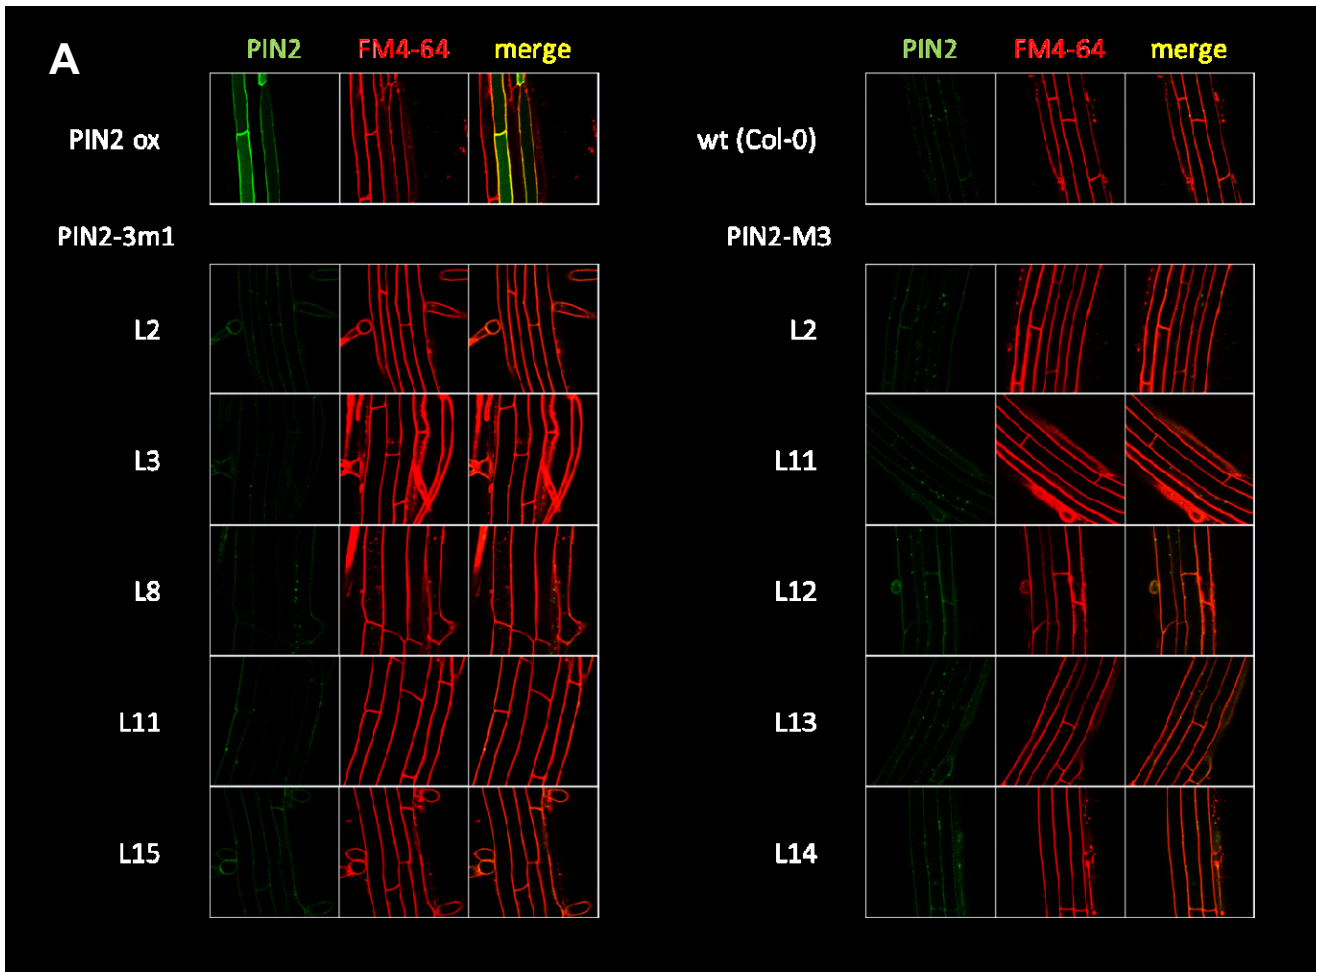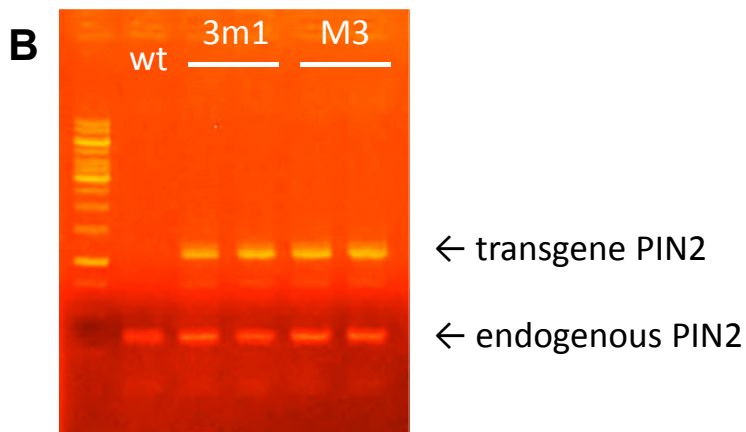

**Figure S6. Confocal images and expression analysis of M3 phosphorylation-defective PIN2 lines. (A)** Confocal images showing the subcellular localization of ProE7:PIN2, ProE7:3m1-PIN2 (PIN2-3m1A), and ProE7:M3-PIN2 (PIN2-M3A) in root hair cells. Four-day-old seedlings were used and stained with FM4-64 (2  $\mu$ M). Five independent lines were observed for each mutant. **(B)** Expression analysis of GFP-fused PIN2 transgene by RT-PCR. Two independent lines were checked for each mutant.

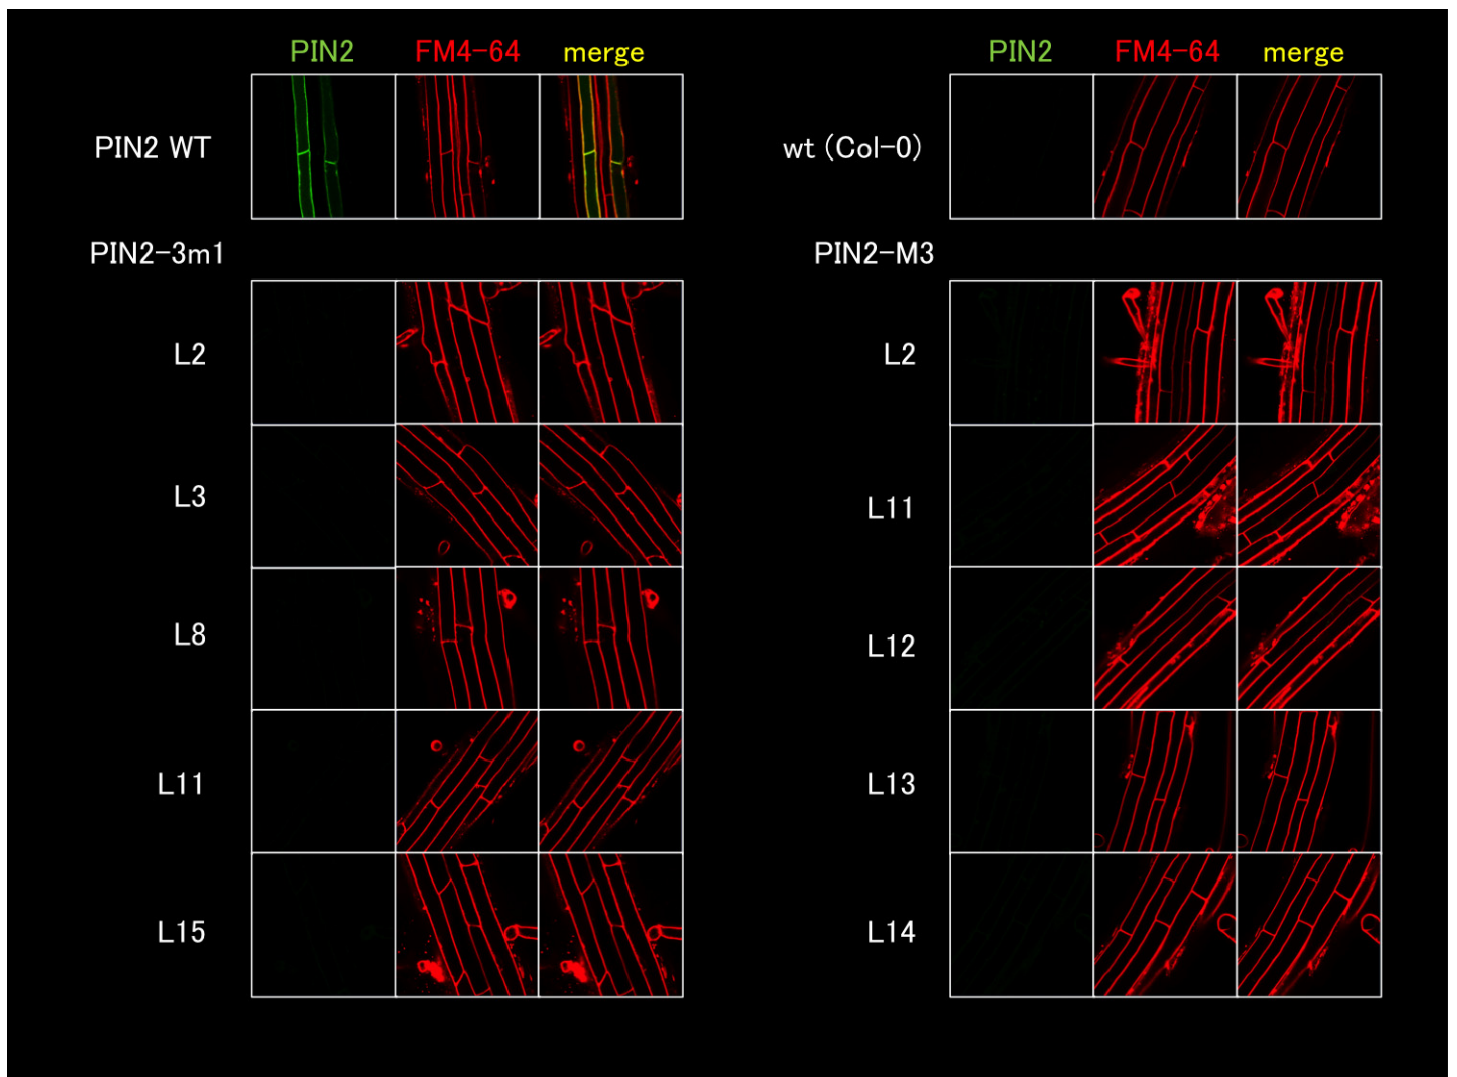

**Figure S7. Confocal images of auxin-treated M3 phosphorylation-defective PIN2 lines.** Confocal images showing the subcellular localization of ProE7:PIN2, ProE7:3m1-PIN2 (PIN2-3m1), and ProE7:M3-PIN2 (PIN2-M3) in root hair cells. Transgenic seedlings were treated with 5  $\mu$ M NAA for 2 h and stained with FM4-64 (2  $\mu$ M). Five independent lines were observed for each mutant.

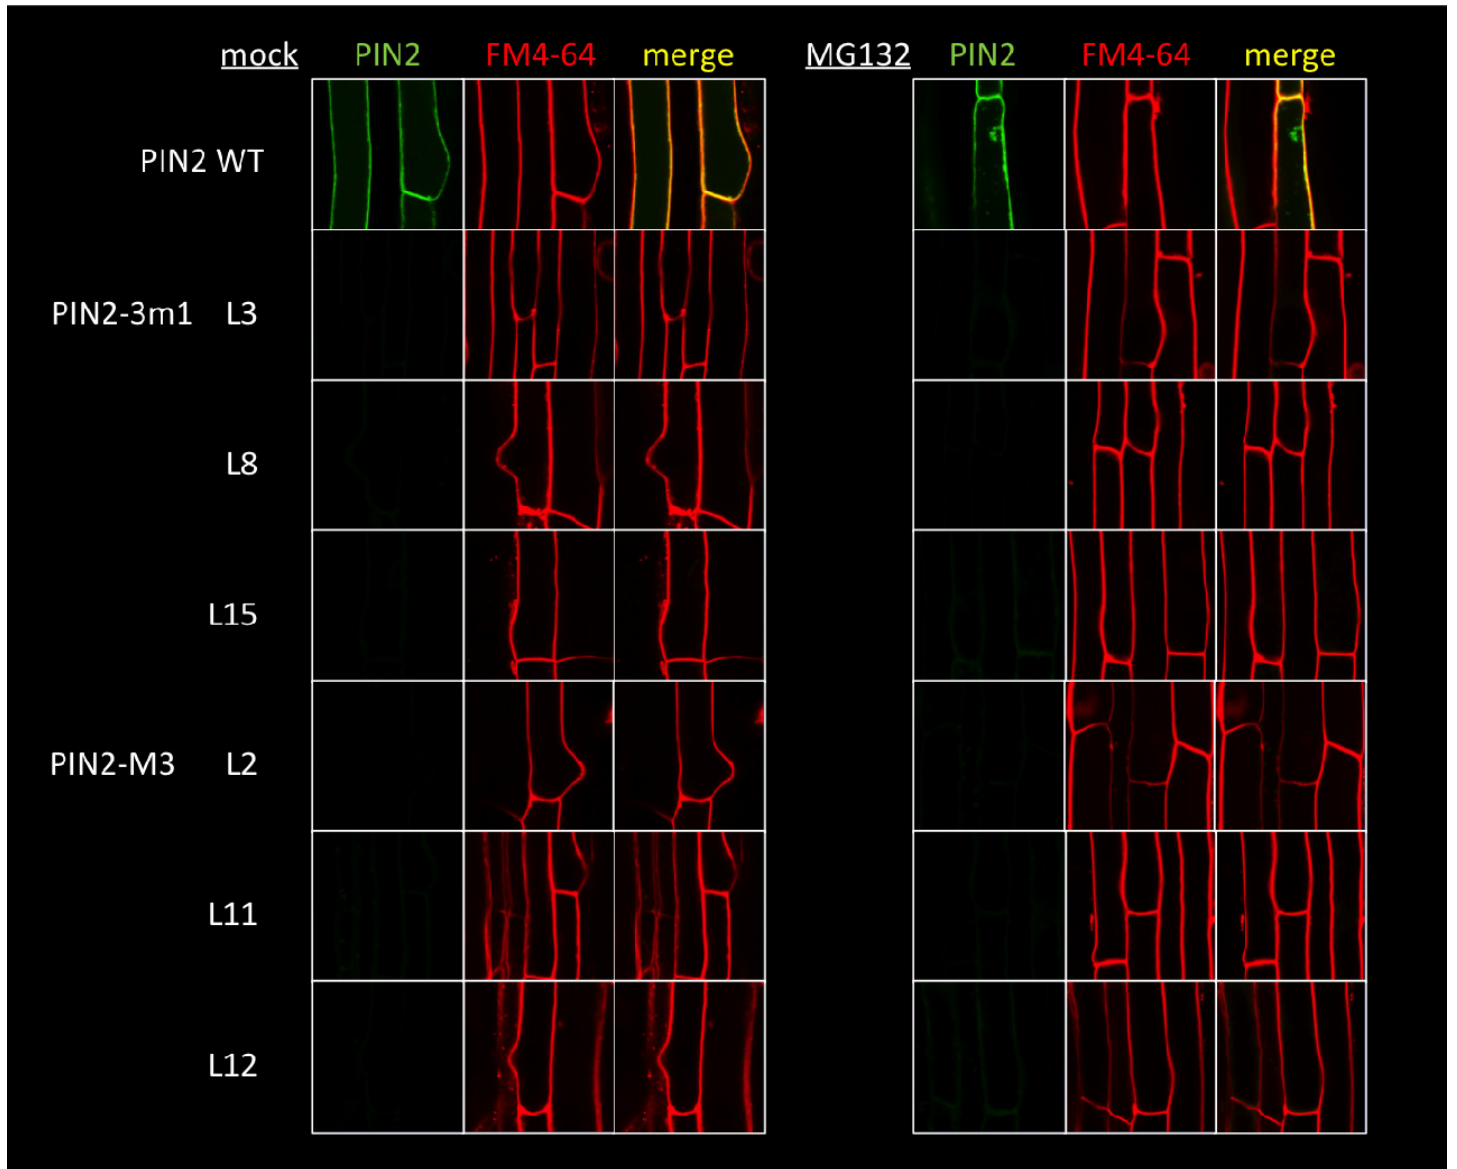

**Figure S8. Confocal images of MG132-treated M3 phosphorylation-defective PIN2 lines.** Confocal images showing the subcellular localization of ProE7:PIN2, ProE7:3m1-PIN2 (PIN2-3m1), and ProE7:M3-PIN2 (PIN2-M3) in root hair cells. Transgenic seedlings were treated with 25  $\mu$ M MG132 for 2.5 h and stained with FM4-64 (2  $\mu$ M). Three independent lines were observed for each mutant.



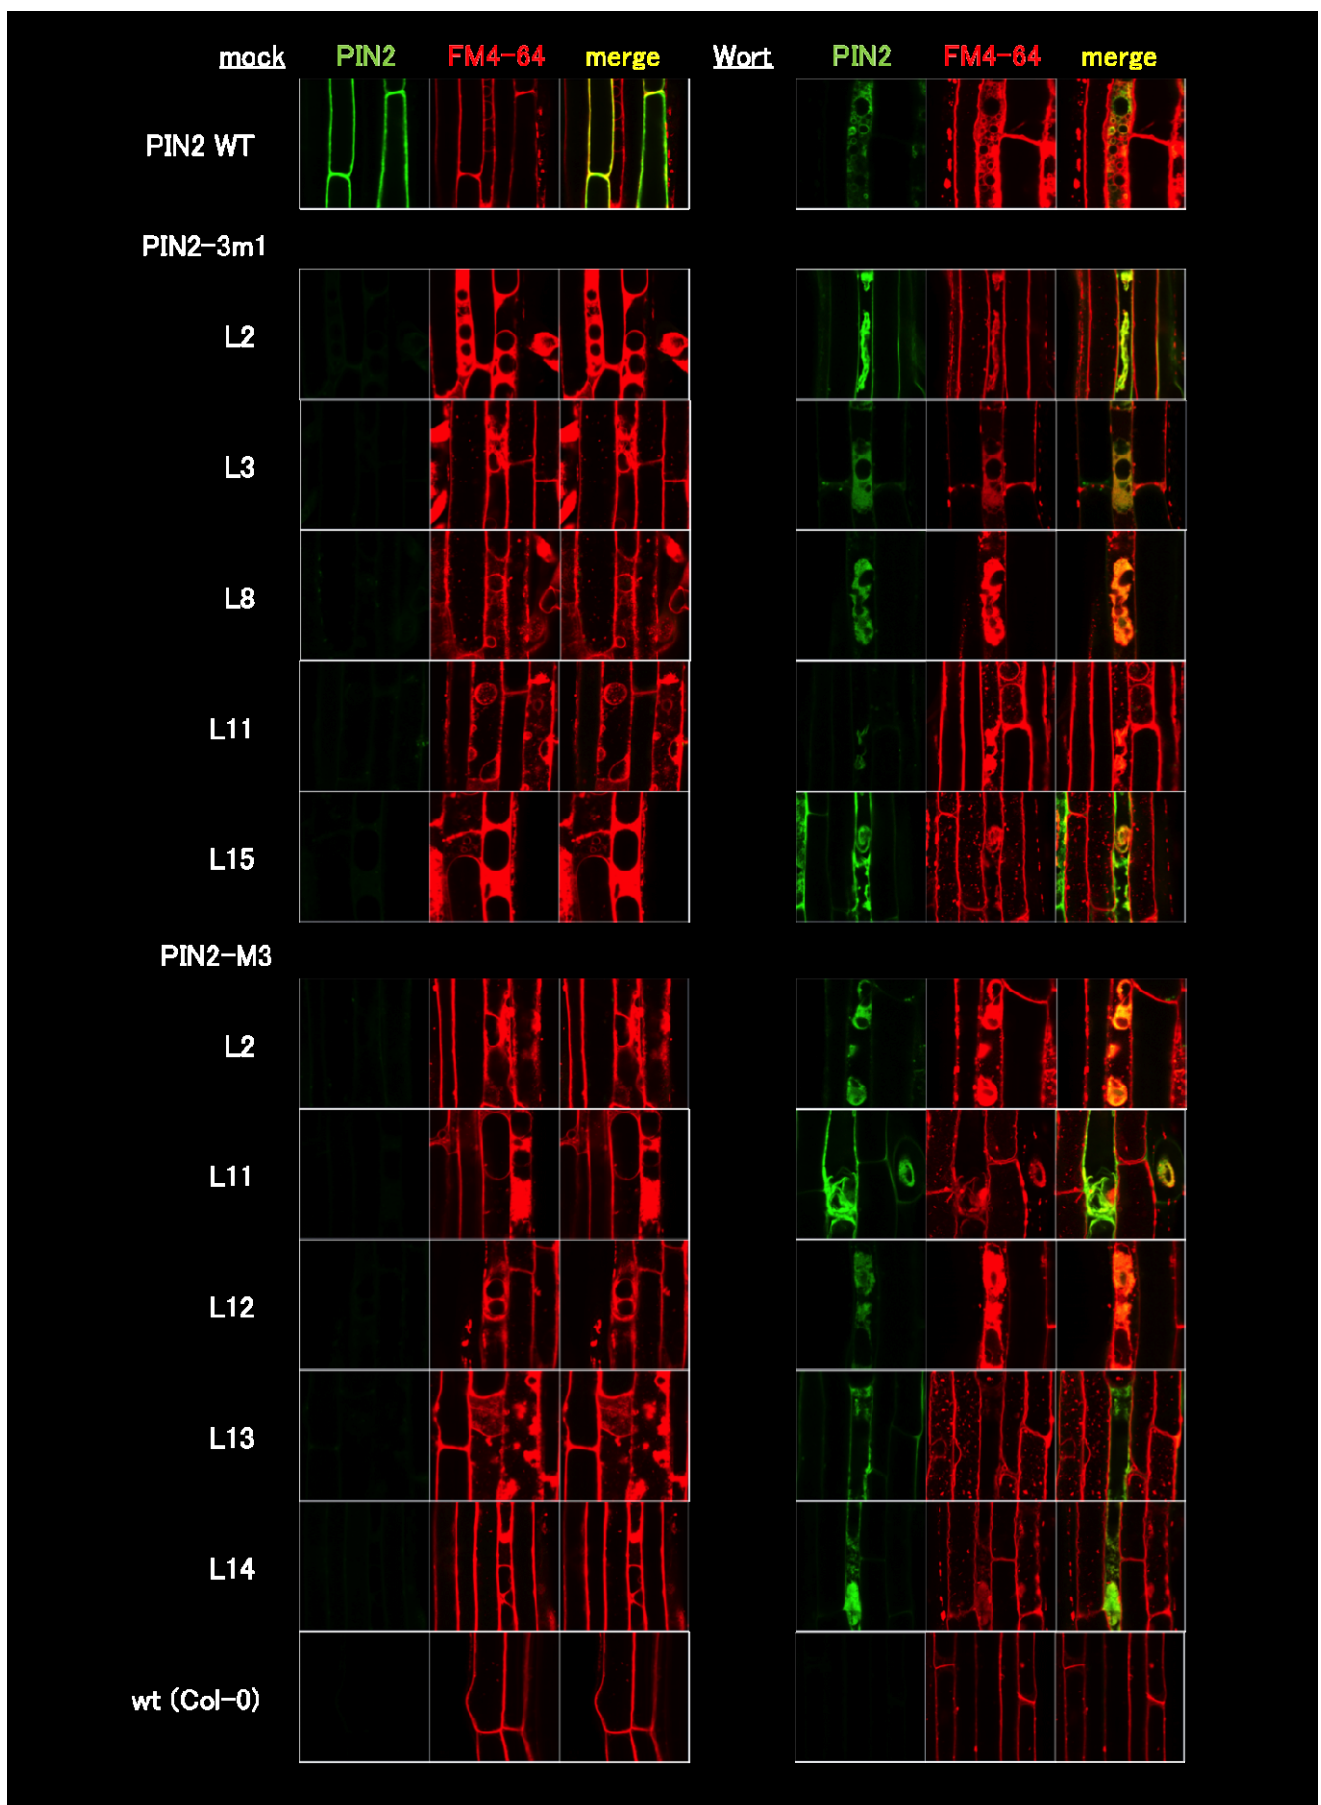

**Figure S9. Confocal images of Wortmannin-treated M3 phosphorylation-defective PIN2 lines.** Confocal images showing the subcellular localization of ProE7:PIN2, ProE7:3m1-PIN2 (PIN2-3m1), and ProE7:M3-PIN2 (PIN2-M3) in root hair cells. Transgenic seedlings were treated with 20  $\mu$ M Wortmannin (Wort) for 12 h and stained with FM4-64 (2  $\mu$ M, for 2 h). Five independent lines were observed for each mutant.

**Table S1. Primer list**

| Subject             | Template           | Primer Name | Sequence (5' to 3') <sup>1</sup>                                                         | Subcloning Site |
|---------------------|--------------------|-------------|------------------------------------------------------------------------------------------|-----------------|
| PIN1, 2, 7 mutation |                    | E7 5'-tDNA  | TGA AAA TCC CCT CTA TAT AAG ATT GTC TC                                                   |                 |
| PIN1, 7 mutation    |                    | mGFP4R118   | CCG TAT GTT GCA TCA CCT TCA CCC T                                                        |                 |
| PIN2 mutation       |                    | GFP342RV    | CTC GAC CAG GAT GGG CAC                                                                  |                 |
| PIN1-3m1 mutation   | ProE7:PIN1:GFP     | PIN1 M3A-R1 | TTG <u>AGC</u> CCT TCT CGA GTA AAT ATC AGA CCT <u>TGC</u> AGC ATT <u>AGC</u> ACG ACG AAC | SalI, NcoI      |
| PIN1-M3 mutation    | ProE7:PIN1-3m1:GFP | PIN1 M3A-R2 | GGT TAG ATT <u>CGC</u> AGG TCT AGG <u>TGC</u> CGC AGA TAA                                | SalI, NcoI      |
| PIN2-3m1 mutation   | ProE7:PIN2:GFP     | PIN2 M3A-R1 | GTG <u>AGC</u> TTT GTT GAA TGA AGA GAT CAT TGA TGA GGC GGC ACT <u>TGC</u> TCT TCG AAC    | SalI, XmaI      |
| PIN2-M3 mutation    | ProE7:PIN2-3m1:GFP | PIN2 M3A-R2 | GGT GAG ATT <u>TGC</u> AGC TCG CGG <u>CGC</u> TAT CAT GGA                                | SalI, XmaI      |
| PIN7-3m1 mutation   | ProE7:PIN7:GFP     | PIN7 M3A-R1 | ACC ACC GTA AAA <u>AGC</u> TCT CCG <u>AGC</u> AGC GTT <u>TGC</u> TTT TCT CAC             | SalI, NcoI      |
| PIN7-M3 mutation    | ProE7:PIN7-3m1:GFP | PIN7 M3A-R2 | GGT GAG ATT <u>AGC</u> CGG ACG AGG <u>AGC</u> CAT ATT AGT                                | SalI, NcoI      |

<sup>1</sup> The mutation sites are underlined.
